# Supplementary material for: Fate and biological impact of persistent luminescence nanoparticles after injection in mice: a one-year follow-up
Source: Royal Society of Chemistry journal article supplement (doi:10.1039/d2nr03546d), 2022-01-01
Supplement: d2nr03546d10.pdf [file d2nr03546d10.pdf]

| Batch | ZGOOH   |      |         | ZGONH <sub>2</sub> |      |         | ZGOPEG  |      |         |
|-------|---------|------|---------|--------------------|------|---------|---------|------|---------|
|       | HD (nm) | pdl  | ZP (mv) | HD (nm)            | pdl  | ZP (mv) | HD (nm) | pdl  | ZP (mv) |
| 1     | 86,7    | 0,14 | 23,8    | 196,5              | 0,15 | 29,9    | 116,5   | 0,15 | /       |
| 2     | 90,8    | 0,13 | 22,9    | 152,0              | 0,12 | 33,7    | 107,0   | 0,11 | -1,0    |
| 3     | 87,6    | 0,11 | 17,4    | 177,2              | 0,12 | 32,9    | 109,3   | 0,10 | -0,4    |
| 4     | 93,2    | 0,12 | 24,3    | 174,2              | 0,10 | 33,4    | 120,4   | 0,09 | -0,5    |
| 5     | 88,4    | 0,19 | 24,0    | 125,3              | 0,10 | 32,4    | 121,4   | 0,11 | -1,2    |
| 6     | 82,9    | 0,12 | 24,8    | 144,3              | 0,11 | 32,3    | 117,1   | 0,11 | -1,3    |
| 7     | 89,1    | 0,18 | 24,9    | 144,2              | 0,11 | 35,3    | 117,6   | 0,09 | -4,6    |
| 8     | 79,7    | 0,13 | 27,9    | 181,0              | 0,11 | 37,1    | 144,2   | 0,14 | -2,7    |
| 9     | 88,2    | 0,14 | 23,1    | 229,8              | 0,18 | 24,0    | 177,9   | 0,14 | -1,4    |
| 10    | 86,3    | 0,13 | 27,5    | 213,1              | 0,16 | 26,6    | 167,4   | 0,10 | -2,0    |

|                    |      |      |      |       |      |      |       |      |      |
|--------------------|------|------|------|-------|------|------|-------|------|------|
| Mean               | 88,1 | 0,14 | 24,1 | 169,5 | 0,13 | 31,8 | 138,1 | 0,11 | -1,7 |
| Standart deviation | 8,0  | 0,02 | 2,9  | 19,2  | 0,03 | 3,9  | 20,4  | 0,02 | 1,3  |
